# Supplementary material for: Comprehensive Analysis of Calcium Sensor Families, CBL and CIPK, in <em>Aeluropus littoralis</em> and Its Expression Profile in Response to Salinity
Source: Preprints.org preprint supplement (doi:10.20944/preprints202302.0407.v1), 2023-02-23
Supplement: Supplementary file 1 [file supplementary]

| Amplicon | | Leaf PCR eff. | | GC% | Tm | Primer length | Sequence (5'->3') | Gene symbol |
| --- | --- | --- | --- | --- | --- | --- | --- | --- |
| Tm | **length** | **SD** | **Mean %** |
| - | 78.7 | - | - | 47.8  47.8 | 67.0  66.2 | 23  23 | **F:** CGGCATGATTAGCAAGGAAGAGT  **R:** GCGTCAGGATGGAAGACAGATAA | *ALCBL2** |
| 79.8 | 139 | 0.016 | 94.1 | 50.0  57.9 | 65.7  66.2 | 22  19 | **F:** CGAACGGTGACGGTAAGATAGA  **R:** GCTCCAGAGGCCAGAACAA | *AlCBL4.1* |
| 81.4 | 163 | 0.016 | 92.1 | 52.6  52.6 | 63.0  62.9 | 19  19 | **F:** CAAAGACGGGCTGATTCAC  **R:** AGGGTGGAAGATGTTGAGG | *AlCBL4.2* |
| 78.3 | 155 | 0.013 | 92.9 | 41.7  42.3 | 65.6  65.6 | 24  26 | **F:** TTATTGAACGGCATGAGCTAAAGG  **R:** ATTCCACTCCTCTTGATCTATCTTCC | *AlCBL4.3* |
| 96 | 78.8 | 0.019 | 93.7 | 50.0  50.0 | 64.7  64.9 | 22  20 | **F:** TCTAAGAGGGACAGGCTACATC  **R:** ACAGTGCTATCCGACAGACA | *AlCBL4.4* |
| 81.3 | 69 | 0.029 | 92.4 | 47.4  52.9 | 60.0  61.1 | 19  17 | **F:** GATGGATCTCCCTCAACTT  **R:** CGTTCACCGAGAAGCAT | *AlCBL10* |
| 80.5 | 200 | 0.025 | 89.8 | 50  48 | 63  63 | 20  21 | **F:** CTTGGTCTGCTGTTGTCTTG  **R:** CACGGTTCACTTATCCATCAC | *AlUBQ* |
| 78.5 | 107 | 0.022 | 93.6 | 55  60 | 63  63 | 20  20 | **F:** ATTCACTGGCTGACCGGATG  **R:** GTGCCAAGGGTTGTGAGGTC | *AlRPS3* |
| 80 | 97 | 0.016 | 95.2 | 50  45 | 63  62.5 | 18  20 | **F:** TGCTGTCGGTGTCATCAA  **R:** CTTCCATCAAACGCCTCATT | *AlEF1-a* |

**Table S1.** List of primers of *AlCBL* genes used in qPCR analysis

* Not amplified

**Table S2.** List of primers of *AlCIPK* genes used in qPCR analysis

| mplicon | | Leaf PCR eff. | | | GC% | Tm | Primer length | Sequence (5'->3') | Gene symbol |
| --- | --- | --- | --- | --- | --- | --- | --- | --- | --- |
| Tm | **length** | **SD** | **Mean %** | |
| 81.3 | 156 | 0.030 | | 94.5 | 52.9  50.0 | 59.6  59.9 | 17  18 | **F:** GGCGTGTATCACAGAGA  **R:** AGGTGCGATGTAGTTAGG | *AlCIPK1.1* |
| 78.2 | 94 | 0.016 | | 85.6 | 47.6  55.0 | 64.2  64.7 | 21  20 | **F:** TCTCTGAAGACGAAGGAAGGA  **R:** GGCTTGAGGTCCCTATGGTA | *AlCIPK1.2* |
| 80.5 | 101 | 0.023 | | 93.6 | 50.0  45.0 | 61.8  62.0 | 18  20 | **F:** AGGGAACATTCGCAAAGG  **R:** CATCTTGTGCTTGAGAACCT | *AlCIPK3.1* |
| 80.5 | 62 | 0.024 | | 93.7 | 58.8  55.6 | 64.3  64.6 | 17  18 | **F:** TCCTGTGGCGTCATCCT  **R:** ATGTTGGCGTCGTCGAAG | *AlCIPK4* |
| 80.7 | 61 | 0.018 | | 89.2 | 64.7  61.1 | 64.4  63.4 | 17  18 | **F:** CCGCCCGTCATCATCAC  **R:** CGTCTTCCTCCGACCATC | *AlCIPK5* |
| 77.8 | 138 | 0.024 | | 90.0 | 50.0  45.8 | 67.6  67.6 | 22  24 | **F:** ACACCGCCTCAACAATCATCAC  **R:** CAGCATTCACAGACATCACACCTT | *AlCIPK10.2* |
| 80.4 | 128 | 0.024 | | 92.8 | 52.4  50.0 | 64.6  65.5 | 21  22 | **F:** CAGAGTCAAGGAGGCAAGATG  **R:** GACAACACCACAAGACCAGATG | *AlCIPK10.6* |
| 82.8 | 86 | 0.015 | | 85.5 | 55.6  52.9 | 59.8  61.0 | 18  17 | **F:** GTGTAGTGAGGAGGGAAG  **R:** CTTGAAGACGGCGACTT | *AlCIPK11* |
| 79.5 | 69 | 0.020 | | 91.4 | 58.8  47.4 | 62.6  62.7 | 17  19 | **F:** GCACAGCGTGATGGATG  **R:** AATGGTTGAGGAGCAGGAT | *AlCIPK12.1* |
| 80.2 | 55 | 0.029 | | 92.3 | 58.8  55.6 | 62.8  61.8 | 17  18 | **F:** GTCCTCTTCGTGCTCGT  **R:** CGTTGTCCAGGTGGTTAC | *AlCIPK12.3* |
| 81.9 | 148 | 0.023 | | 93.6 | 58.8  55.6 | 63.5  63.5 | 17  18 | **F:** GTCACGCCTTCGCTGTA  **R:** GCTTCGTCTCGTCACCTT | *AlCIPK23* |
| 77.2 | 75 | 0.024 | | 91.6 | 44.0  60.0 | 67.1  66.8 | 25  20 | **F:** CCAATTATGTTGCTCCTGAGGTGAT  **R:** CTCCGCAAGACCAGACATCC | *AlCIPK26* |
